# Supplementary material for: Evaluation of Organic Wastes as Substrates for Rearing Zophobas morio, Tenebrio molitor, and Acheta domesticus Larvae as Alternative Feed Supplements
Source: PubMed Central journal article supplement (PMC7564407; doi:10.3390/insects11090604), 2020-09-05
Supplement: insects-11-00604-s001.pdf [file insects-11-00604-s001.pdf]

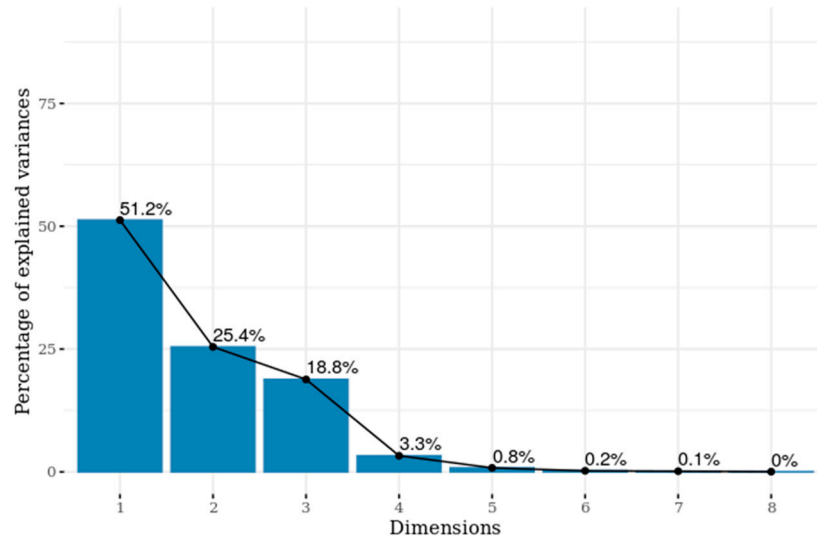

**Figure S1.** Contribution of variables explaining the total variance in the substrates composition, based on the PCA

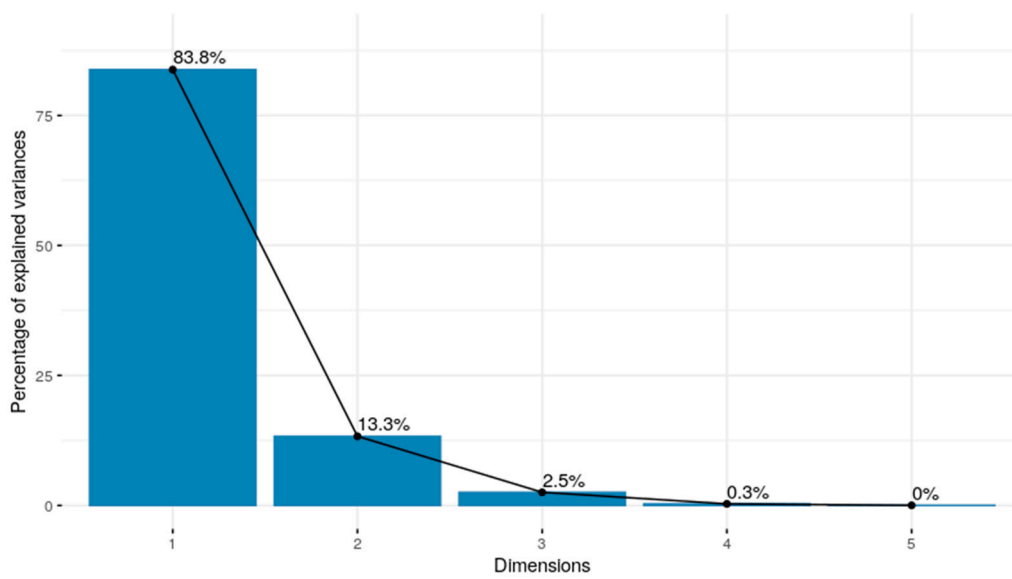

**Figure S2.** Contribution of variables explaining the total variance in the larvae composition, based on the PCA
